# Supplementary material for: Pain Catastrophizing in Older Adults with Chronic Pain: The Mediator Effect of Mood Using a Path Analysis Approach
Source: PubMed Central journal article supplement (PMC7408783; doi:10.3390/jcm9072073), 2020-07-01
Supplement: jcm-09-02073-s001.pdf [file jcm-09-02073-s001.pdf]

|     | ANX     | DEP     | PNI     | ISI     | PCS |
|-----|---------|---------|---------|---------|-----|
| ANX | 1       |         |         |         |     |
| DEP | .732*** | 1       |         |         |     |
| PNI | .249*** | .188*** | 1       |         |     |
| ISI | .297*** | .275*** | .177*** | 1       |     |
| PCS | .498*** | .366*** | .366*** | .244*** | 1   |

\*\*\* $P < .001$ ; ANX = anxiety as measured by General Well-being Schedule; DEP = depression as measured by General Well-being Schedule; PNI = Pain Intensity as measured by numeric rating scale for the previous seven days; ISI = Insomnia Severity Index; PCS = Pain Catastrophizing Scale.

|                             | Estimate | Standardized regression coefficients<br>bstd <sup>(1)</sup> | Std. Err | z-value | p     | Std.lv <sup>(2)</sup> |
|-----------------------------|----------|-------------------------------------------------------------|----------|---------|-------|-----------------------|
| indir.WOM.to.PCS (thr. PNI) | 0.459    | 0.013                                                       | 0.214    | 2.144   | 0.032 | 0.459                 |
| indir.LAC.to.PCS (thr. PNI) | -0.680   | -0.018                                                      | 0.247    | -2.759  | 0.003 | -0.680                |
| indir.COM.to.PCS (thr. PNI) | 0.257    | 0.028                                                       | 0.065    | 3.922   | 0.000 | 0.257                 |
| ind.WOM.to.PCS (thr. ISI)   | 0.270    | 0.010                                                       | 0.165    | 1.636   | 0.102 | 0.270                 |
| indir.LAC.to.PCS (thr. ISI) | -0.081   | -0.004                                                      | 0.051    | -1.603  | 0.114 | -0.081                |
| indir.COM.to.PCS (thr. ISI) | 0.031    | 0.006                                                       | 0.017    | 1.776   | 0.073 | 0.031                 |
| indir.ISI.to.PCS (thr. PNI) | 0.095    | 0.012                                                       | 0.051    | 1.874   | 0.061 | 0.095                 |

Indir = indirect effect; PCS = Pain Catastrophizing Scale; WOM = Women; PNI = Pain Intensity as measured by numeric rating scale for the previous seven days; LAC = Low alcohol consumption; COM = Number of comorbidities; ISI = Insomnia Severity Index

(1) Completely standardized solution (estimates of parameters if the variances are unity).  
(2) Dependent Variable is standardized.

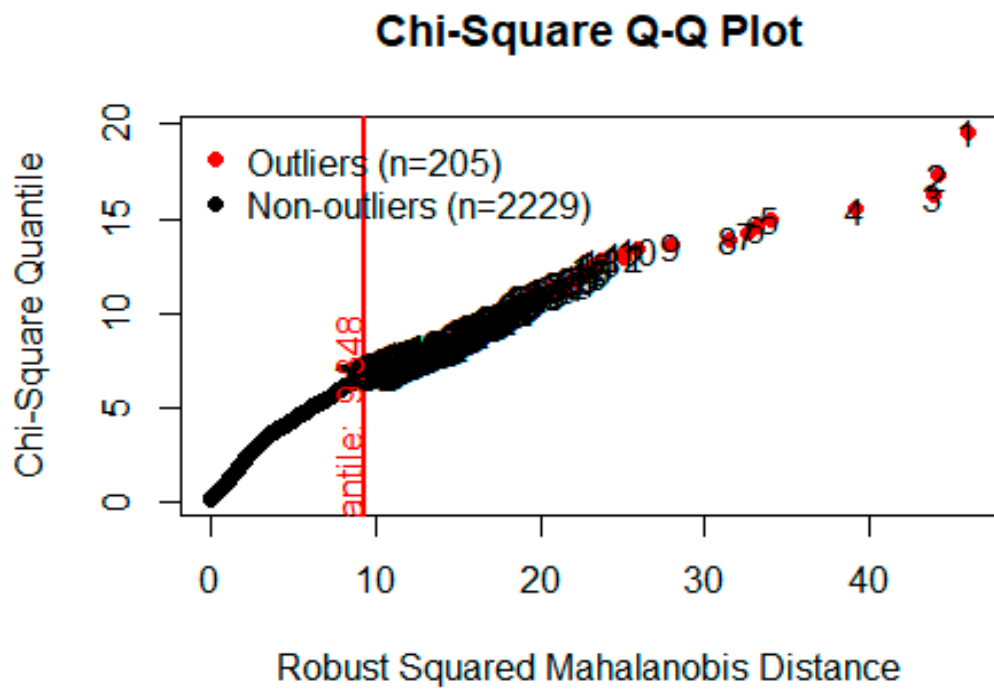

**Supplementary Figure 1.** The mahalanobis distance (MD) for all cases.
